# Supplementary material for: Function and Distribution of 5-HT2 Receptors in the Honeybee (Apis mellifera)
Source: PubMed Central journal article supplement (PMC3855752; doi:10.1371/journal.pone.0082407), 2013-12-06

Figure S3

A

*Am5-ht2α* ATGGAGGG----- 9  
*Dm5-ht2α* ATGGAGATCAAAGCTACTCTGGTCGTGGACCATCGACAGGCACATCAGAAACAGCAACAGCAACAGCAG 70

*Am5-ht2α* ----- 9  
*Dm5-ht2α* CAGTTGCATCTGCATCTGCATCAGACACAGCAGCAACATTACACTGCGACACTTCAATTGTCGGTGG 140

*Am5-ht2α* -----GATCTGATCGCCTCTTGACCGGCAACTGACC 42  
*Dm5-ht2α* AGAGGCGGATTTGGCTGGGCCCTCGCCAGCCGTTTATTGACTGCGAAGGCAGCCACACCAACAGCACATCC 210

*Am5-ht2α* GCGATGTTGCACACCTGCCCTGCAACGACACCTTCCTCCACCGA----- 87  
*Dm5-ht2α* TACACCCCCAGCAGCCTGCCACACAGCAAAAACTCATCGAGGGA-----CCCAACAACACATTCCAGTGTGCAC 280

*Am5-ht2α* -----TGCCCGGAGGAGTGTGGACTCGCCTCG-- 114  
*Dm5-ht2α* GGCAAGCTATCGACGAAGCGGAGCACAACGCATTCTATAGTTGCGATGGGGAAAGCCCATTGTCTGAAAA 350

*Am5-ht2α* -----TCGGGATTGATCACATGTGCACGGCC 141  
*Dm5-ht2α* CTGCACTTTGGAGCTGAAGGCGGACTGTTGCGATGGCCGTACGAGGCGTATGAGCACATTGACTGGCA 420

*Am5-ht2α* GAGAAGGGAAGCTTCGCCTCGTCCATGACTCTGCTCTGCACGCCCTGCGACTACTGCAACTGCGACGTGA 211  
*Dm5-ht2α* ATCAACCGGGCAGCTCAGTGATTATGCTAGTGATAAACTTAGT-----GATAGTTCGAGCTGCGATGAAG 484

*Am5-ht2α* ACGTGTCTCTGGTCTCAGCGGCTGGAGAGCGTGGAGGGCGTTTCTGTCCAGGTTGCCGAGGTTGCA 281  
*Dm5-ht2α* GAGGCATGGTCTTCAATGTAAGCTGGGTGAGGCCCATGAACATTGCTTTGTCTATTGCAACAACCTCGA 554

*Am5-ht2α* CTCAAC-----GAGACCGATTTCCCGATCAG+++----- 309  
*Dm5-ht2α* CAGGGAGCCACTGCGGGAGGTGGGAAGCGCGGAGGAGAGCTTCTCAACGACAGCCTTCTGCAGGCCTTT 624

*Am5-ht2α* ----- 309  
*Dm5-ht2α* CAAATCGAAGTGGGCGCAGAGCGGATGGACTCTGGTCTTCTTAATCTAAGCGAGCTAATGGAGCCCG 694

*Am5-ht2α* -----ATATGGAGTGCACGGGACT-----ACGGAGAACCGGACTAC 347  
*Dm5-ht2α* ATCACGGATTCCTGGGCATCATGAATGTCAACAACACTAGCTTAGACATGTTTTTCCGAACCTTAGAGC 764

*Am5-ht2α* GGAGGATCTGACTATCTCTGCTCGCACAGGCGGAAGGGCTTGAATCCGGCTGGAGCAGA----- 408  
*Dm5-ht2α* CCTGAACACGACTCCACGGCTCGACTGCAGACATGGCCACCGAGTTCCGGGTAAACAAGAGCTTTCTG 834

*Am5-ht2α* -----GGCGACGTCTCGACTGGAACTTCTCTTCGTTCGTGATTTATCCTTGGCGGTGGCCTGG 469  
*Dm5-ht2α* GACTACAGTCCCATGGCTACGATTTCTATTTCTGTTTCGTGGTGTCTTTATCTTGGCGGTGGCCTGG 904

*Am5-ht2α* GGAACATACTCTCTGTCTCGCTGTGGGCTCGATAAAAGGCTGCACAACGTACCAATTACTTCTCTTT 539  
*Dm5-ht2α* GTAATATCCTTGTGTGCCTAGCCCTTGCCTTGGACCGGAACCTGCAGAATGTGACTAACTACTTCTCTTT 974

*Am5-ht2α* GTCTCTCGGTTGGCCGATTTACTCGTCAGCCTGTTGCTCATGCCCTCGGGCGGATCCAGGCTTCTTG 609  
*Dm5-ht2α* TTCCCTGGCTATAGCCGATCTCTGGTCAGTTGTTTGTGATGCCCATGGGCGGATAACAGCTTTTTTG 1044

*Am5-ht2α* G+++GATACTGGCCATTCCGAGTGGTGTGGTGAACGTGTACGTGACGTGCGATGTGCTGGCTTGTTCGG 676  
*Dm5-ht2α* G+++GGTATGGCCACTTGGCTTTACCTGGTGAACATTTATGTGACGTGTGACGTACTGGCTGCTCAT 1111

*Am5-ht2α* CGAGCATAATGCACATGTGCTTCATCTCGTTGGGCGGATCTCGGCATCCGGAATCCITTTGGGACGAG 746  
*Dm5-ht2α* CCAGTATATGACACATGTGCTTCATCGGTTTGGGACGCTATATGGGAATAAGAAATCCATTGGGCTCGAG 1181

*Am5-ht2α* GCACACGTCCACAAACGGATGTCGGCTTCAAGATAGCGGCTGTGTGGTTGCTCGCCATGTTGGTCTCC 816  
*Dm5-ht2α* GCATCGATCTACGAAACGATGACTGGTATAAAGATAGCCATTGTTGGGTAATGGCCATGATGGTATCC 1251

*Am5-ht2α* AGCTCGATCACGTTTTGG+++GCATAATAAATCCTCTAAACATCATGCCACGGCGGGAGCGTGCCTGA 883  
*Dm5-ht2α* AGTTCAATAACCGTCTTTG+++CTCTGGTCAATGAGAAGAGCATTAATGCCCGAGCCTAACATATGCCTTA 1318

*Am5-ht2α* TCAACAACAGAGGTTTTTTCGTGTTGGCTCTCTGATCGCCTTCTACATACCCATGATCGTTCATGGTAGC 953  
*Dm5-ht2α* TCAACAATCGCGCTTTTTTCGTGTTGGATCTCTGGTAGCTTTTATATACCCATGCTGATGATGGTATC 1388

*Am5-ht2α* CACTTACATTCGACGGTGCAGCTGCTCAGGCAAAAAGCCCGTTTTCATCGCGGAACATCCTGAACGAGAT 1023  
*Dm5-ht2α* CAGATACGCATGACGATTCCCTCTCTCCGGAAGAAAGCGCGATTTGCCGCGGACACCCGGAAGTGA 1458

*Am5-ht2α* CAATTCCGAAG---GCTGGGAGC----- 1044  
*Dm5-ht2α* CTTTTCGCAG+++GTTGGGTGGACGCTTACCCTAAGGCCGAGCACAGCCAGCAGCAGTTGCAGATGT 1525

*Am5-ht2α* -----AGCATATTTCTCGACGAG 1061  
*Dm5-ht2α* TCAGTAGCTTTTCTGGCAGCAATAACAAATTCCTATCAATGGGCGACGGCAATCCCAACTTCAACACTGA 1595

*Am5-ht2α* G-----GCTTCCTCCACCGCCACCTCGACCGTGGAAACCGCCACCCCT----- 1104  
*Dm5-ht2α* AGGAGAGATGGAGGAGGGTGGAGCTCCTAGCAGAAAGGAGTGGCGTAGAGCCCGCCGAACGACCTTTGATG 1665

*Am5-ht2α* -----TCGTCGTCGCGG-----TATACGTGGAGG-----ACTTCCG 1135  
*Dm5-ht2α* CAACAGCGAACGGCGAGCAGCAGGAGCATGGGCACGGTTAGTTTCCGTAATGTCGTGAACGGGACTAGCG 1735

*Am5-ht2α* GCGGTGTCGGAAGCGACAG+++TFTAACCAAATTAACCGCGGAGGCTCTGTGCCGT----- 1188  
*Dm5-ht2α* GACCCGCGGGAAGTGGGCG---CAGGACGACAGGCACTGCCCAAGCAGCAGCTTCCGTTCTCTGGCGCCGG 1802

*Am5-ht2α* ----- 1188  
*Dm5-ht2α* CATCCTTCGGCACTCGTCGTCGCTCCCGCCTCGAGCTGCCACTCCACCAGCAGTCGCGTTTCGAGCTCC 1872

*Am5-ht2α* -----CGCAAACATAAC----- 1200  
*Dm5-ht2α* TTCTGGCGCAAACACGGCGGCTATCCAAACCTAATGGACAG+++ACTGGCCATACATTTAAGACTTTCTT 1939

*Am5-ht2α* -----AGGTGCAGGGGGGCAAGGTCGCGCGCAAAGTCTCAACCGCAGTTGAA 1247  
*Dm5-ht2α* TGGTACCACCCAGTAGCCATCCAATCGACGGGCATCTGTGCGTCTCACCATCTCCAGCCACAAATGGG 2009

*Am5-ht2α* TTTCCGCGTGAAACGGG----- 1263  
*Dm5-ht2α* TTTACCCGACCAATGTAGGTGGAATGGAGGTAGAACTGTTGGAGCGACGGAGGTGGGGGCTGGTGGCAAT 2079

*Am5-ht2α* -----GCGAGTAACCGGC CGGAACCGGGCCAGGACTGGCCAGCAAAG 1315  
*Dm5-ht2α* GGCTCATCAGCCGGCAGAAACGAGCAACTCATCTTTGGAGGCACGAGCTTGATGAAAATCGCAACCATCC 2149

*Am5-ht2α* TGGATCAGGCGACGCAAACGCCGGAGAATATCGGC----- 1350  
*Dm5-ht2α* ACGGACCGGATACTGAACCAAAGTCAGGCAGCTGGAGGCAATCACATGGTGCAAAAAGTGAAGCCGACGGC 2219

*Am5-ht2α* -----CGTGAAACAAGGAATTTCACTCTGAAGGCTTTGAACTCCAATTAAC---GTCAGTCCC 1407  
*Dm5-ht2α* TTTAAAACCGGAAGAACCAACGCAACAAAGTCGGCCCTTTAATTTGCTTCAACCGCGTTGCGACG 2289

*Am5-ht2α* AACACCCTGAATCTCAG+++GTTTCTCCCGGTAGAAACGAAGAGGATCGTTGGCCCGCAACGCCGTTG 1474  
*Dm5-ht2α* CCACCCTCAATTTGCG+++TTTTCTAAACAAATCCAGTAACGAAACAGCTTGTGGCCCAATGCCGTTG 2356

*Am5-ht2α* CAACGGAGCAGAAAGCCAGCAAGGTGTTGGGCTGGTTTTCTTCATGTTTCGTGCTCTGCTGGGCCCCGTT 1544  
*Dm5-ht2α* CTACGGAGCAGAAAGCCACCAAGGTGCTCGGATGGGTGTTTTCACCTTCGTTCTGTGCTGGTCCCTTT 2426

*Am5-ht2α* CTTTCTACTAAACATATTTTTCGGCGGTGCCCGAATGCTCGGTCCCGGTACACGTGGTCAACGTCTGT 1614  
*Dm5-ht2α* CTTTCTTGAACATATATTTTTCGGCATGCCCGAGTGCCAAATGTCGGGAGCACGTGGTGAATACCTGC 2496

*Am5-ht2α* CTGTGGCTCGGATACGTGTCTCCACGATCAATCCGGTCATCTACACCATTTCAATAGAACGTTTCAGGG 1684  
*Dm5-ht2α* CTTTGGCTTGGCTATGTCTCTCCACGATCAATCCCATCATCTACACCATATTTCAATCGCACGTTCCGGG 2566

*Am5-ht2α* CTGGGTTTATCAGATTGTTGAAGTGAAGTGTTCAG+++GTCAGCAAGGCCGAGGCATCGTTCAAGTAC 1751  
*Dm5-ht2α* CGGCCTTTATCCCTGCTCAAGTGAACGTCGAAACG---GTGA 2607

*Am5-ht2α* GGAGAGTGGACGAAACGCGATGAGCCTGTGCACCCGACCGCGTGCCATTGGTCATTAGTCTTCAGGGT 1821  
*Am5-ht2α* ACGCCGTTGTTGACGCCAACACCGAATCCGACGCGGCCACGCCGCGCTCGGCAACCTCCTACGTGACGA 1891  
*Am5-ht2α* TGATGCATCGCAGCCAACCTCCCTTTACCGTGACACTTTTCATCAACACGAGCAGCATCAGAATTTGTTG 1961  
*Am5-ht2α* A 1962

B

*Am5-ht2β* ATGATCGACTCGTCGACGACGACGATCGATCGCGCGGATCCTCACGAGGCCGTGTCGACAGCTGTACC 70  
*CG42796* ATGGAAGAGGATGTGTATGCCTCGCTAGGTGCCTACAACGACAGCGGTGGCGACATTGGAGCAGCTCGG 70

*Am5-ht2β* ACGATCTTTTGTCTTTGGCGAACGAC-----AGCAGCGCGCTTTGCAACGGATCAGGAGGATTGGACGT 134  
*CG42796* ACGACCTGGTCTGTGCGGAGGAGGATGAGACGCAGCGAACGACTGCTAATGCCACAGTCGGCATAATCA 140

*Am5-ht2β* ACTGAACGACACC-----GTCCATCTAGAGATTGACCCGGTGAAACGGACACGGTTGGACGTGACCGGA 198  
*CG42796* ACTGCATGTGGCCAGGTGGAATCCACCGGCAATCGACCATCAGCGCGACTTCGAGGACGTACCCTTC 210

*Am5-ht2β* ---TTGAACAATTTGGTGGGCGATGCTCGCCTTGCTCCTGGTGTGGGCACAGCAGCCGGCAATATTTGG 265  
*CG42796* GATGCCAACAACTACTGGGCCCTATTTGGCCCTGCTCCTCGTCTGGGAACAGCGCCGGGAAACATCCTTG 280

*Am5-ht2β* TCTGCTTGGCCATGCCCAGGAGAGGAGATGTCAGAACGTCACCAATATTTCCCTGATGAGCTTGGCCAT 335  
*CG42796* TCTGCTTGGCCATCGCCTGGGAGCGCCGGCTGCAGAAATGTACCAACTACTTCCCTATGTTCGCTGGCCAT 350

*Am5-ht2β* CACGGATCTGCTCGTAGCCGTGCTGTAAATGCCCTTGGAACTACTACTTTGGTACAGAG+++GATATTT 402  
*CG42796* CACCGATCTCATGGTCCCGTGTCTGGTATGCCCTGGGCATCCTTACGCTGGTCAAAG+++GCTACTTT 417

*Am5-ht2β* CCTCTGCCGTCACTTTACTGCCTCGCTTGGATCTGCCTGGATGTATTATTATGCACAGCGAGCATCATGC 472  
*CG42796* CCTTTGGGCTCGAGCACTGCCTCACCTGGATCTGCCTGGATGTACTCTTCTGCACGGCCAGCATCATGC 487

*Am5-ht2β* ACTTGTGCACCATAAGCGTGGACCGATACCTCAGTCTACGGTATCCATGAAATTCGGTTCGGAATAAGAC 542  
*CG42796* ACCTGTGCACCATCTCCGTGGACAGATATTTATCGCTACGATACCAATGCGATTGGCCGCAATAAAAC 557

*Am5-ht2β* GAGGCGGCGGTCATGTTGAAATCAGCTTCGTCTGGGTTCTCAGCATCGCGATGAGTTTGCCACTGAGT 612  
*CG42796* ACGTCGGCGGTCACCTCTCAAAATGTTTTCTGTTGGCTTCTCAGCATCGCCATGAGCTTGCCCTTGAGC 627

*Am5-ht2β* CTGATGTACTCAAG+++GAGGACGACTCGGTGCTGGTGCACGGTGCCTGTCAAATACCGGATCCCTGT 679  
*CG42796* TTGATGTACTCAAG+++AATCAGCCCTCGGTGCTGGTGAATGGAACITGCCAGATACCGGATCCCGTGT 694

*Am5-ht2β* ACAAGTTGATCGGCAGCATAATCTGCTTTTACATAACCGTGGGCGTGATGCTGCTTACGTACCGGTGAC 749  
*CG42796* ACAAGCTGGTCCGCTCATTGTATGCTTCTACATTCACCTGGGCGTGATGCTGCTGACATATTGCCGTGAC 764

*Am5-ht2β* AATGACATTTGCTGGCGAAACAGCAAAGAAATATAGGACGA-----ACTACTGGT 798  
*CG42796* CTTCCGACTTTTGGCCCGGCAGCGCCAGAATCTGGTGGTGGACAGCAGACGGCGCGGCCACTCCCGGA 834

*Am5-ht2β* TGGTCTCCGGATGGCTGGGTGGCCCGCAGGGCCATCTTCGGGAG+++GCCTGGACAGGAAAGGCACGT 865  
*CG42796* TGGCCAGTGGATGGCTCGGC-----CAGGCACG-----GCCTTGG+++AACGACGATGCACCT 886

*Am5-ht2β* GGAAAGCATTTCTGTTGAGCAAAAACCCGGCCGGAAGCGGCGGTACAACCGAGCACACTTCCGGCAATC 935  
*CG42796* ---GCGGCGCCTTTTGAACCGGGTCCAGGTAACGCCTCCTCGGTGCTGCACGCACACTCGGGCAATTC 953

*Am5-ht2β* GACAGACACCGAGCTGACGACACTGGACACTCACGAACTCTGGCTTCCGGAAAGC-----GAG 993  
*CG42796* AACGGATACGGATCTCAGCACTTTGGACAACACGAGCTCTGGCTGCCGATTCCAG+++CATAAAGGAG 1020

*Am5-ht2β* CCGCCGCCCTCGCCATGTTCCGCCCTTACGCTTTCGGCGCAGAGATGCTCAAGTTGTCGAGGGGCTGG 1063  
*CG42796* CCAAAGCCCAAGACCATGACGCCCTTGCATCAGTTCGGTGCAGAGATGCTGAAACTATCCGAGGCCTGG 1090

*Am5-ht2β* AGGGTATCACCCAGCCCT-----GGAAGCCCTATGGGC----- 1095  
*CG42796* AGTCGGTGGCTCGTTCATCCACCACCGGCTCACCAACCAAAATCCGAATTTTCCCTATCGAACCACCTGCA 1160

*Am5-ht2β* -----ACACCAGATCCACGCTCAACAACCTCGATCCAGCAACATCAGCATCAGCAACAG 1149  
*CG42796* GCTGCAGTACCCAGCAGCCACAGCGATATGCGCCACCACCAGCAGTCCACCAACCAACCAACAG 1230

*Am5-ht2β* TCGCACAGGTGACGCTTCCGTACGG+++GAGCGGGAGAGCGGGGG----- 1194  
*CG42796* CAGCATCCGGCCGGAGTTTACACCA---GCAGCATCGCCAAAAGGTCGCCACGGAACCACAGTTCTGG 1297

*Am5-ht2β* -----AGCAGCGCTTCCGG 1208  
*CG42796* GTCTGTCCACCACCAGCTGGGCATCGAGCGGGAGAGACCAGGAATTCCTGGCCAGCAGTGCATGGG 1367

*Am5-ht2β* TTCAGGACGAGCTCTC---GATCCAAGAAGATCTCAGCTCGCCAACGCCGTGAAACATCCAGCTGGA 1275  
*CG42796* CCGCGAACAGAGCGATGG+++GACTCTTTTACAGCTTTCCCAACGATTGCGAGCTATAAAAAGCCACGA 1434

*Am5-ht2β* CCGCGCTCACGTTCAAC-----GAGGCTCACCTTGAGCGGACCG 1315  
*CG42796* ACAGCTTCGTGAGCTGTTTCCCTGGACGTGAGAAACGTGCCGGGCATGAGGACGCAGACGAGGATGTGAAA 1504

*Am5-ht2β* ACTCGGGATCGCCGAAGACGCCTAGGAAGCGATCGTT CAGCTTCACGAGCAGCCCGTGTTCGGGCGTGG 1385  
*CG42796* CGCCACGTC AACCGTGCGCCACAAAGCGCCATAA CAGTCTGCCAAGAACGCACTCTATCCGCGACA 1574

*Am5-ht2β* CTCCTCCGTTTCAGGAAGAGCTCCTCGAAC-----GAGGAAACGC CGCAGAGCCGGAAGTCCG 1443  
*CG42796* CACCACTGTACAGAGAGCCTCGATGACGACGACGACGAGGAGGAGCAGAGCGCGCAACAGAAGCATCAG 1644

*Am5-ht2β* AGCGACAAA----- 1452  
*CG42796* CAGACGAAAGTCGAAGATCTGCCACTCGGACACTGAGCTAGATCCTCCGAGAAGCGAAGCAGTGCCACA 1714

*Am5-ht2β* -----CAGGAGGGTGAGATCGCCCTCCGCGCCCGTGCACGTGCCATACTTCGGCGA 1505  
*CG42796* TAGCCGGGCAGAATCATCAGTCGCACTACTTGCAGCTGCCCTCGGTTTGCACCTTCCGTAITTTGGGGA 1784

*Am5-ht2β* G-----TCG 1509  
*CG42796* CAGACCGCTCCAGAATTGTGTGAAATCGGCGGAGGTGAAGATTATTTTCGTCCGCTTCCGAGTGACCACC 1854

*Am5-ht2β* TCGTCCGAGGAGACCCCCGCCCAA CCTTCT---ACCGAGATCGTGATCGTTTCCAGC----- 1563  
*CG42796* ACCACGACCGCGGTGAGCAGTTCGCCAGCGAGATGGAGCTACTCATGTGCAGTAGTGGCAATAAAAAGT 1924

*Am5-ht2β* -----GA 1565  
*CG42796* CATTGACCTCCAGTGTGAGTGCCGGCATAACAGGTGGACCGGCAGGAGCGGCTCCAGCCACAGTTGGCTC 1994

*Am5-ht2β* CACGATGAGGCCGATCTCGGGCAA GAACCTCAGGGCGGCTTTCCTGGGAAGGAGCAAC---AGCGGCAGG 1632  
*CG42796* CAGCCTCAGTCCACACTCTCTCAAAATCAGGCGAGCTCGCTGACAGTTTCAGAGCGATGGTAGTGGGTAC 2064

*Am5-ht2β* ATGGAGGGCAGCAGAAGC-----TACGAGCTGAATTCCGTTGTCA 1672  
*CG42796* TTGGCTGCTCCGGAACTCCTTGTCTTGCCGACGAAAGTTGAGCATCTCAAAGACCGCCTCGGTGCTCA 2134

*Am5-ht2β* CCTCGAGAGGG-----TCACGAGAGGGTCTAGTTTGGGAC+++GAAGC----- 1713  
*CG42796* CGTGGGATTCAAGTCGTCACTGTCGGCGGGG CAGCAGTTTGGCG---GAGTGCGAACATCCCTGCTGTT 2201

*Am5-ht2β* -----ACGAGGAC CAGCCTGTGACGTCGAGGCCAGCCCCGATCCGCGCGCGGCAGCATGCTGACC 1776  
*CG42796* GACGCCCACCAAAACAGCGACCACCTCAACTCATCCACACCGTTGAGAAATCGGCACCTTGAGGAGT 2271

*Am5-ht2β* CACAAC-----GGGGCCGCGAGCCTCGGCTCGAGCAAAGCAGCAATTCCGTCGTCCCGT 1831  
*CG42796* CACCA GAATATGAACTACCAGGAGCGGGCGAATGTGGTGGCAAGACCAGGACGCAACATCCTCACCT 2341

*Am5-ht2β* GCCCCACAGATACCAAACGACACTACG CAGCCACCACTCGAGGACGAGCAGCGTGTGTCCCGAACAG 1901  
*CG42796* GCATGTTGCAGCGTCAGCAGACGTCGATCTCATCACTCGCGAACTCAGCGTGATCTCCAGAACTC 2411

*Am5-ht2β* CTCGCGCCACGTCGGATCATCAGGCTCGAGCAGAAGGCCACCAAGGTGCTCGGGTGGTGTTCCTT CAGG 1971  
*CG42796* CTCGCGCCACGCAAGGATCATCAGGCTCGAGCAGAAGGCCACCAAGGTGCTGGCAGTGGTGTTCCTT CAGG 2481

*Am5-ht2β* TTCGT CATACTGTGGGCGCCGTTCTTCGTTCTCAACTGATCCAGCCGTGTGCCCAACTGCGAGAGAC 2041  
*CG42796* TTCGTAATCCTCTGGTCCGCAATCTTCGTCCTCAATCTCCTGCCACGGTGTGCCGGAGTGCAGGAAC 2551

*Am5-ht2β* AAATCGACCACAAGATATTTCGACCTGGCCACCTGGCTGGGCTACGC CAGCTCCATGGTGAACCCCATCTT 2111  
*CG42796* GAATTAGCCACTGGGTCTTTCGACCTGGTCACCTGGCTGGGCTACGCTAGCTCCATGGTGAACCCCATCTT 2621

*Am5-ht2β* CTACACCATCTTCAACAAGGTGTT CAGACAAGCGTTCAAGAAGGTGTGCTCTGCAGGTACAGGAAT--- 2178  
*CG42796* CTACACCATCTTCAACAAGGTGTTCCGGCAGGCGTTCAAGAAGGTCTGCTGTGCCGCTATTTCAGCAGC 2691

*Am5-ht2β* CAAA CGTGGAGACCGTCCAGGTAG 2202  
*CG42796* AGTGCCTGGCGACCGAGCAGATAA 2715

C

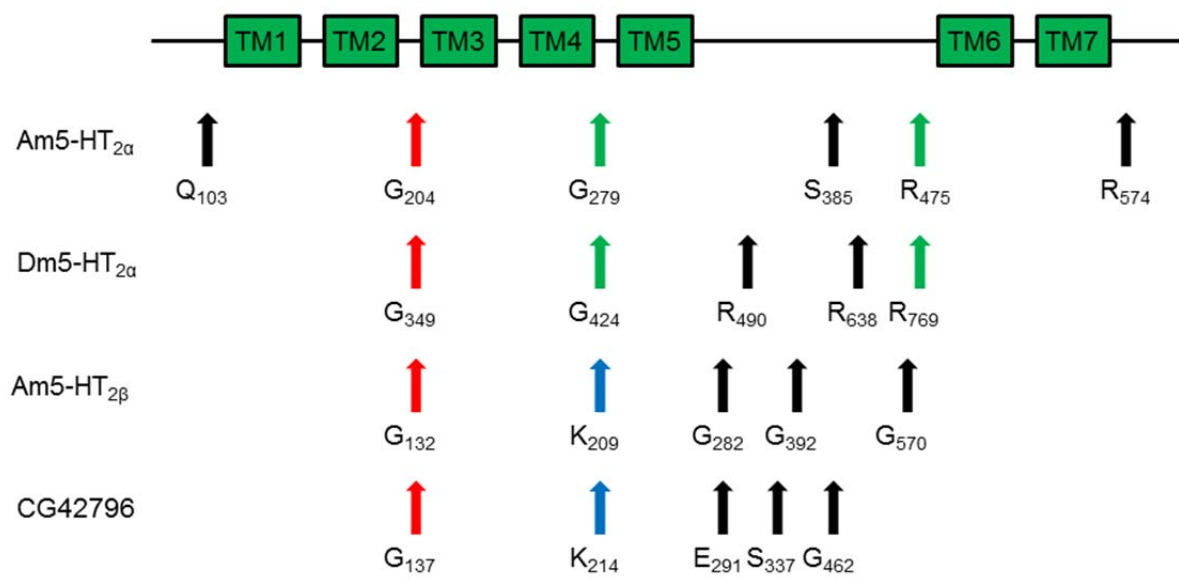

Supplement: pone.0082407.s003.pdf [file pone.0082407.s003.pdf]
