# Supplementary material for: Function and Distribution of 5-HT2 Receptors in the Honeybee (Apis mellifera)
Source: PubMed Central journal article supplement (PMC3855752; doi:10.1371/journal.pone.0082407), 2013-12-06
Supplement: pone.0082407.s001.pdf [file pone.0082407.s001.pdf]

**Figure S1**

| <b>transcript</b>   | <b>primers and probes (5' → 3')</b>                                                                                     | <b>amplicon size</b> |
|---------------------|-------------------------------------------------------------------------------------------------------------------------|----------------------|
| <i>Am5-ht2a</i>     | sense: GTCTCCAGCTCGATCACGGTT<br>antisense: GGGTATGTAGAAGGCGATCAGAGA<br>probe: Cy5-CGTGATCAACAACAGAGCGTTTTTCGT-BBQ       | 126 bp               |
|                     | 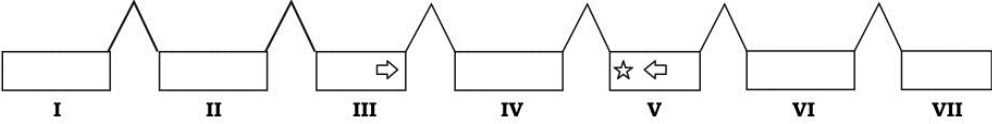                                      |                      |
| <i>Am5-ht2aΔIII</i> | sense: CCAGGCTTCTTGGGCATAAT<br>antisense: GGGTATGTAGAAGGCGATCAGAGA<br>probe: Cy5-CGTGATCAACAACAGAGCGTTTTTCGT-BBQ        | 114 bp               |
|                     |                                       |                      |
| <i>Am5-HT2β</i>     | sense: GAGTTTGCCACTCAGTCTGATGTACT<br>antisense: GCAGATTATGCTGCCGATCAAC<br>probe: Cy5.5-TGGTGGACGGTGCCTGTCAAA-BBQ        | 109 bp               |
|                     |                                     |                      |
| <i>Am5-HT2βΔII</i>  | sense: CACTTTGGTCAGAGGAGGACGA<br>antisense: GCAGATTATGCTGCCGATCAAC<br>probe: Cy5.5-TGGTGGACGGTGCCTGTCAAA-BBQ            | 92 bp                |
|                     |                                     |                      |
| <i>AmeF-1a</i>      | sense: GAACATTTCTGTGAAAGAGTTGAGGC<br>antisense: TTAAAGGTGACACTCTTAATGACGC<br>probe: 6FAM-ACCGAGGAGAATCCGAAGAGCATCAA-BBQ | 394 bp               |
