# Supplementary material for: Function and Distribution of 5-HT2 Receptors in the Honeybee (Apis mellifera)
Source: PubMed Central journal article supplement (PMC3855752; doi:10.1371/journal.pone.0082407), 2013-12-06

Figure S2

A

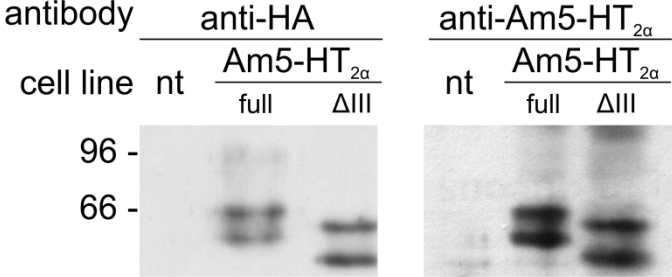

B

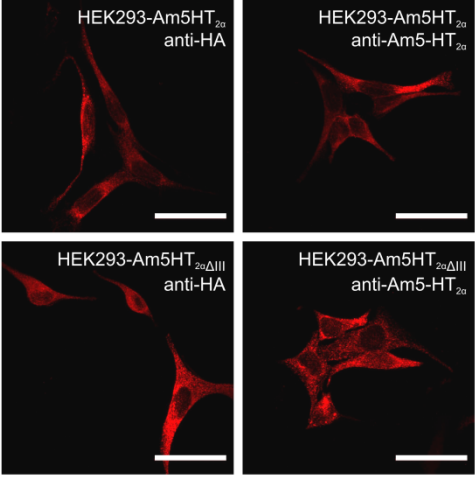

Supplement: pone.0082407.s002.pdf [file pone.0082407.s002.pdf]
